# Supplementary material
Source: HighWire-hosted journal article supplement (https://www.annfammed.org/highwire/filestream/7827/field_highwire_adjunct_files/0/Griffin_Suppl_Table_4.pdf)
Supplement: Griffin_Suppl_Table_4.pdf [file Griffin_Suppl_Table_4.pdf]

Online Supplementary Material

Griffin SJ, Kinmonth A, Veltman MW, Gillard S, Grant J, Stewart M. Effect on health related outcomes of interventions to alter the interaction between patients and practitioners: a systematic review of trials. *Ann Fam Med.* 2004;2:595-608.

<http://www.annfammed.org/cgi/content/full/2/6/595/DC1>

**Supplemental Data, Table 4. Summary of Relationships Between Intervention Categories and Health Outcomes**

| Hypothesis            | Intervention Categories*                                                            | Favored Intervention Group                           |     | Favored Intervention Group With Statistical Significance |     | Favored Control Group       |    | Favored Control Group With Statistical Significance |    |
|-----------------------|-------------------------------------------------------------------------------------|------------------------------------------------------|-----|----------------------------------------------------------|-----|-----------------------------|----|-----------------------------------------------------|----|
|                       |                                                                                     | No.                                                  | %   | No.                                                      | %   | No.                         | %  | No.                                                 | %  |
| <b>Main groupings</b> |                                                                                     |                                                      |     |                                                          |     |                             |    |                                                     |    |
| 1                     | Interventions delivered directly to patients (N = 8 studies)                        | 6 <sup>14,20,21,22,26</sup>                          | 75  | 4 <sup>14,20,21,22</sup>                                 | 50  | 0                           | 0  | 0                                                   | 0  |
| 2                     | Interventions delivered via practitioners (N = 11 studies)                          | 9 <sup>13,31-33,37-42</sup>                          | 82  | 5 <sup>13,31-33,39</sup>                                 | 45  | 5 <sup>29,34,39,40,42</sup> | 45 | 2 <sup>39,40</sup>                                  | 18 |
| 3                     | Interventions delivered both to the patient and to the practitioner (N = 7 studies) | 6 <sup>45-47,49,51,52</sup>                          | 86  | 4 <sup>47,49,51,52</sup>                                 | 57  | 0                           | 0  | 0                                                   | 0  |
| <b>Subgroups</b>      |                                                                                     |                                                      |     |                                                          |     |                             |    |                                                     |    |
| 4                     | Patient activation (N = 17 studies)                                                 | 15 <sup>14,20,21,22,26,39,40,42,45-47,49,51,52</sup> | 88  | 9 <sup>14,20-22,39,47,49,51,52</sup>                     | 53  | 3 <sup>39,40,42</sup>       | 18 | 2 <sup>39,40</sup>                                  | 12 |
| 5                     | Practitioner activation by note or questionnaire (N = 3 studies)                    | 3 <sup>47,49,51</sup>                                | 100 | 3 <sup>47,49,51</sup>                                    | 100 | 0                           | 0  | 0                                                   | 0  |
| 6                     | Communication skills training (N = 6 studies)                                       | 6 <sup>13,31,39,40,41,45</sup>                       | 100 | 3 <sup>13,31,39</sup>                                    | 50  | 2 <sup>39,40</sup>          | 33 | 2 <sup>39,40</sup>                                  | 33 |
| 7                     | Discussion of behavior change (N = 5 studies)                                       | 5 <sup>37,39,40,41,46</sup>                          | 100 | 1 <sup>39</sup>                                          | 20  | 2 <sup>39,40</sup>          | 40 | 2 <sup>39,40</sup>                                  | 40 |
| 8                     | Changes style of information giving (N = 4 studies)                                 | 2 <sup>32,33</sup>                                   | 50  | 2 <sup>32,33</sup>                                       | 50  | 2 <sup>29,34</sup>          | 50 | 0                                                   | 0  |
| 9                     | Provision of information about disease (N = 11 studies)                             | 10 <sup>13,14,21,22,26,33,42,46,51,52</sup>          | 91  | 7 <sup>13,14,21,22,33,51,52</sup>                        | 64  | 1 <sup>42</sup>             | 9  | 0                                                   | 0  |
| 10                    | Attention to emotion (N = 10 studies)                                               | 9 <sup>13,14,21,22,39,40,41,45,49</sup>              | 90  | 6 <sup>13,14,21,22,39,49</sup>                           | 60  | 2 <sup>39,40</sup>          | 20 | 2 <sup>39,40</sup>                                  | 20 |

\* Number of studies with the intervention characteristic reporting a health outcome. Studies measuring but not reporting health outcomes (eg, Street<sup>24</sup>) are not included.
